# Supplementary material for: Cutaneous Delivery of Cosmeceutical Peptides Enhanced by Picosecond- and Nanosecond-Domain Nd:YAG Lasers with Quick Recovery of the Skin Barrier Function: Comparison with Microsecond-Domain Ablative Lasers
Source: MDPI journal article supplement (doi:10.3390/pharmaceutics14020450), 2022-02-19
Supplement: s1 [file s1]

# Supplementary Materials: Cutaneous Delivery of Cosmeceutical Peptides Enhanced by Picosecond- and Nanosecond-Domain Nd:YAG Lasers with Quick Recovery of the Skin Barrier Function: Comparison with Microsecond-Domain Ablative Lasers

Woan-Ruoh Lee, Chien-Yu Hsiao, Zi-Yu Chang, Pei-Wen Wang, Ibrahim A. Aljuffali, Jie-Yu Lin and Jia-You Fang

**Table S1.** The fold change of mean value of PT-1 skin deposition and cumulative amount in receptor after laser treatment as compared with nontreatment control on barrier-deficient skins.

|                    | Barrier-deficient skin | Picosecond Nd:YAG | Nanosecond Nd:YAG | CO <sub>2</sub> Er:YAG |     |
|--------------------|------------------------|-------------------|-------------------|------------------------|-----|
| Skin deposition    | SC-stripping           | 1.3               | 1.3               | 1.5                    | 2.2 |
|                    | Delipid                | 1.1               | 1.1               | 1.8                    | 2.1 |
|                    | Deprotein              | 1.1               | 1.1               | 3.3                    | 5.3 |
| Amount in receptor | SC-stripping           | 6.1               | 17.3              | 2.2                    | 1.9 |
|                    | Delipid                | 1.3               | 2.4               | 4.1                    | 3.0 |
|                    | Deprotein              | 2.5               | 4.1               | 8.5                    | 9.6 |

**Table S2.** The fold change of mean value of PT-38 skin deposition and cumulative amount in receptor after laser treatment as compared with nontreatment control on barrier-deficient skins.

|                    | Barrier-deficient skin | Picosecond Nd:YAG | Nanosecond Nd:YAG | CO <sub>2</sub> Er:YAG |     |
|--------------------|------------------------|-------------------|-------------------|------------------------|-----|
| Skin deposition    | SC-stripping           | 1.6               | 2.2               | 1.6                    | 0.7 |
|                    | Delipid                | 1.8               | 1.4               | 1.5                    | 0.8 |
|                    | Deprotein              | 2.2               | 0.9               | 0.9                    | 1.3 |
| Amount in receptor | SC-stripping           | 7.5               | 3.3               | 2.0                    | 1.0 |
|                    | Delipid                | 12.5              | 6.0               | 3.3                    | 0.5 |
|                    | Deprotein              | 3.5               | 9.9               | 6.1                    | 1.3 |

**Table S3.** The fold change of mean value of CT-1 skin deposition and cumulative amount in receptor after laser treatment as compared with nontreatment control on barrier-deficient skins.

|                    | Barrier-deficient skin | Picosecond Nd:YAG | Nanosecond Nd:YAG | CO <sub>2</sub> Er:YAG |     |
|--------------------|------------------------|-------------------|-------------------|------------------------|-----|
| Skin deposition    | SC-stripping           | 1.2               | 1.0               | 1.0                    | 1.1 |
|                    | Delipid                | 1.9               | 1.6               | 2.4                    | 1.8 |
|                    | Deprotein              | 1.3               | 1.7               | 1.4                    | 1.3 |
| Amount in receptor | SC-stripping           | 1.4               | 1.5               | 1.3                    | 1.5 |
|                    | Delipid                | 1.7               | 2.3               | 1.2                    | 1.3 |
|                    | Deprotein              | 2.8               | 3.2               | 1.6                    | 1.4 |
